# Supplementary material for: Machine learning inference of natural product chemistry across biosynthetic gene cluster types
Source: Research Square preprint supplement (doi:10.21203/rs.3.rs-6220876/v1), 2025-10-28
Supplement: Supplementary file 1 [file 004643d8faead4051f285e1a.docx]

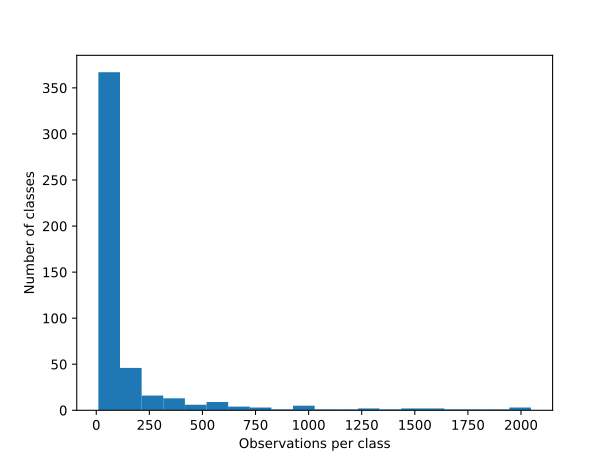


**Supplementary Figure 1:** Number of positive instances per ChemOnt classes (N=485) in the MIBiG 3.1 dataset (N=2,068 BGCs) used to train CHAMOIS.


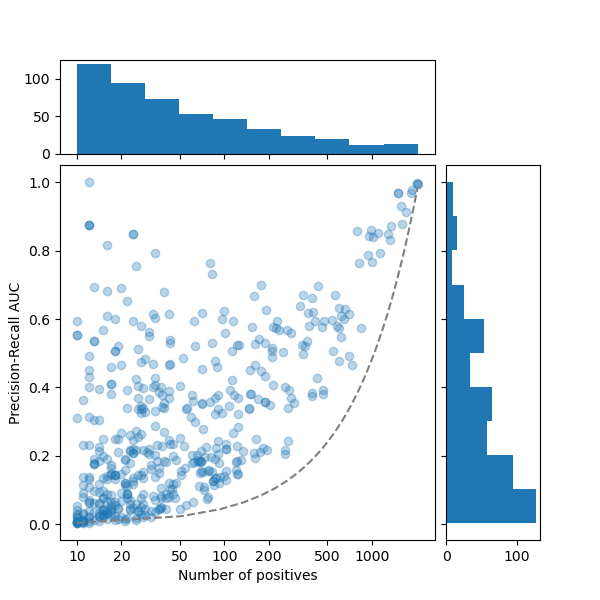


**Supplementary Figure 2:** Distribution of CHAMOIS’s performance per ChemOnt class in function of class members, assessed by cross-validation (see *Cross-validation* section of the Online Methods, and the actual metric for each ChemOnt class in Supplementary Table 1).


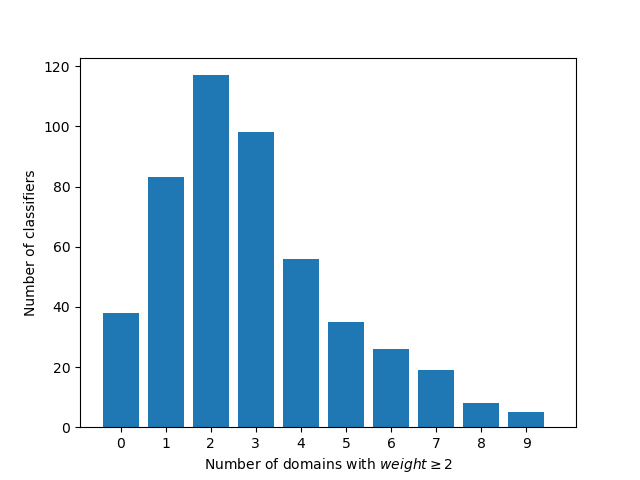


**Supplementary Figure 3:** Number of domains with weight (coefficient) >=2.0 in CHAMOIS’s classifiers (see Supplementary Table 2 for the complete matrix of weights).
